# Supplementary material for: Quantifying Intracellular Mechanosensitive Response upon Spatially Defined Mechano-Chemical Triggering
Source: eLife journal article supplement (doi:10.7554/elife.107220), 2025-07-21

# Figure 4-figure supplement 1-source data 1

Samples were blotted on three separate gels.

Replicate 1

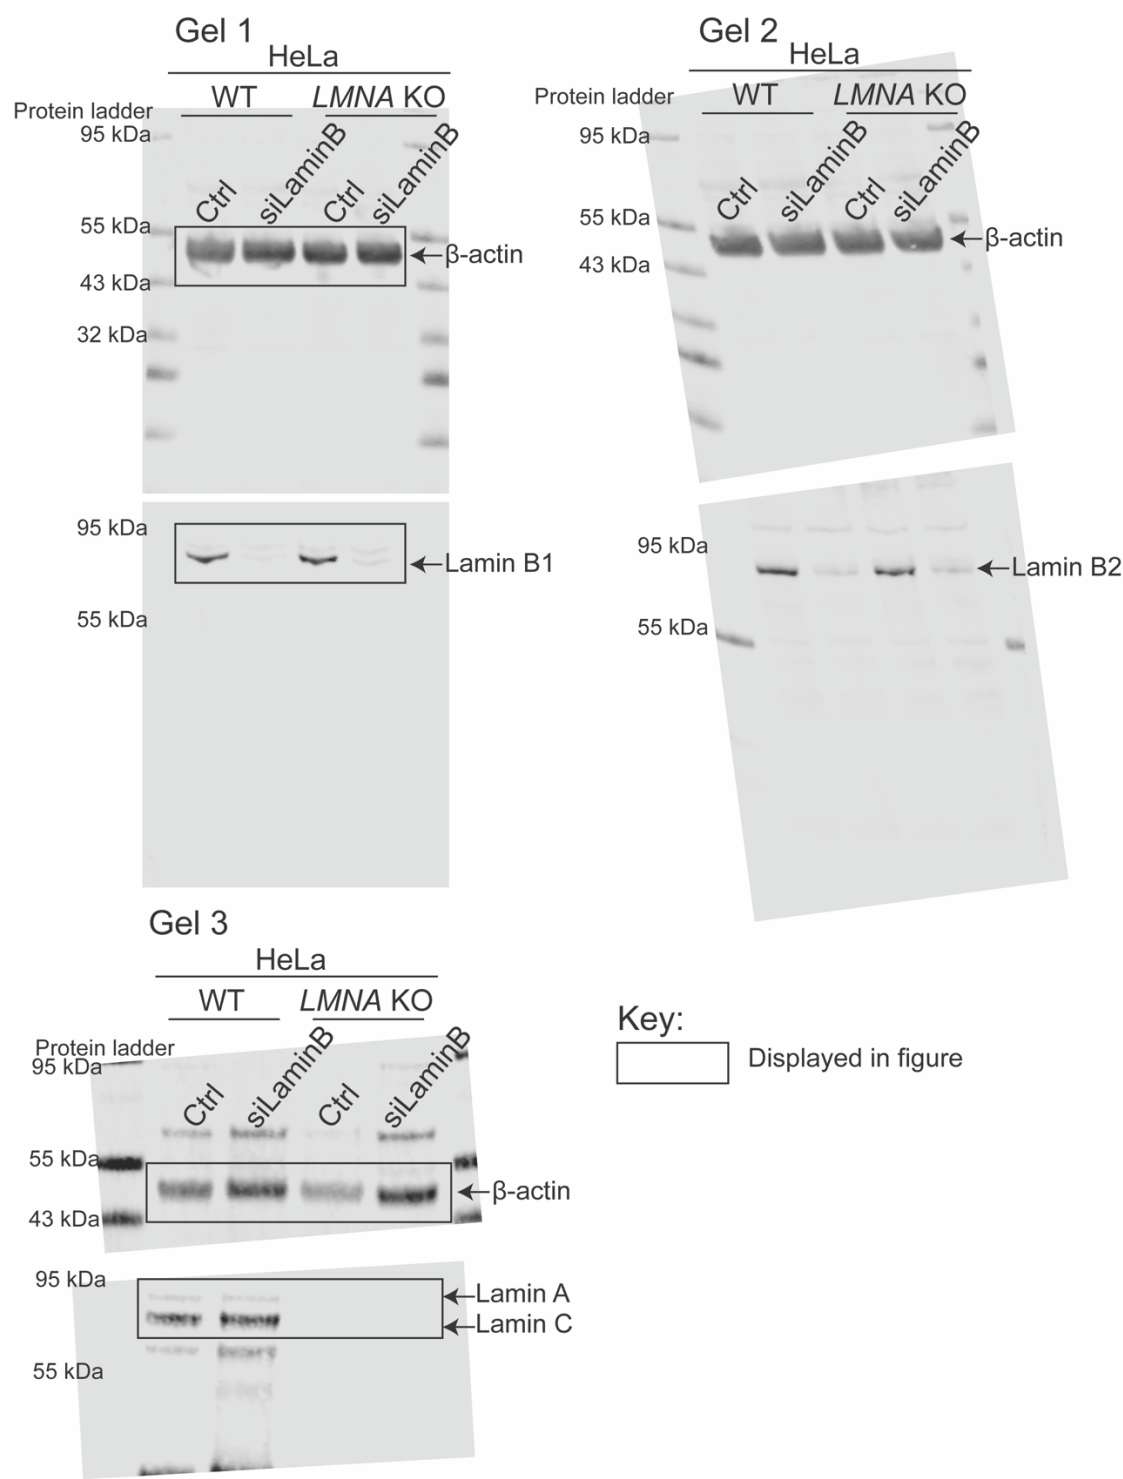

Replicate 2

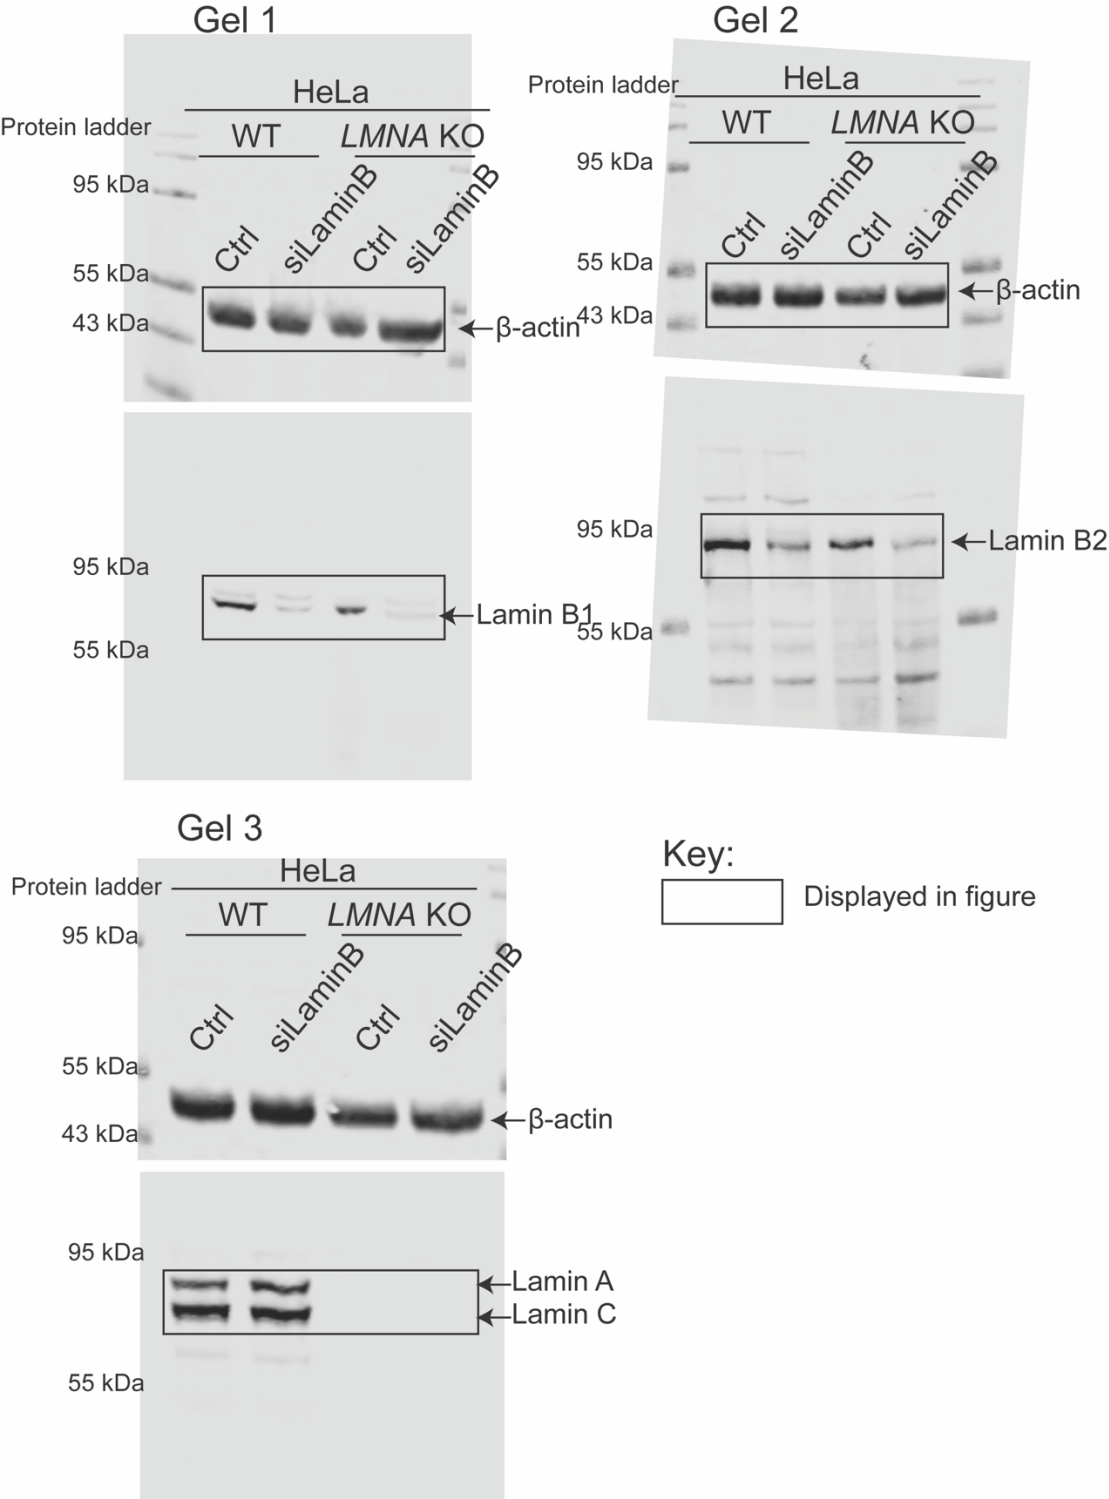

## Replicate 3

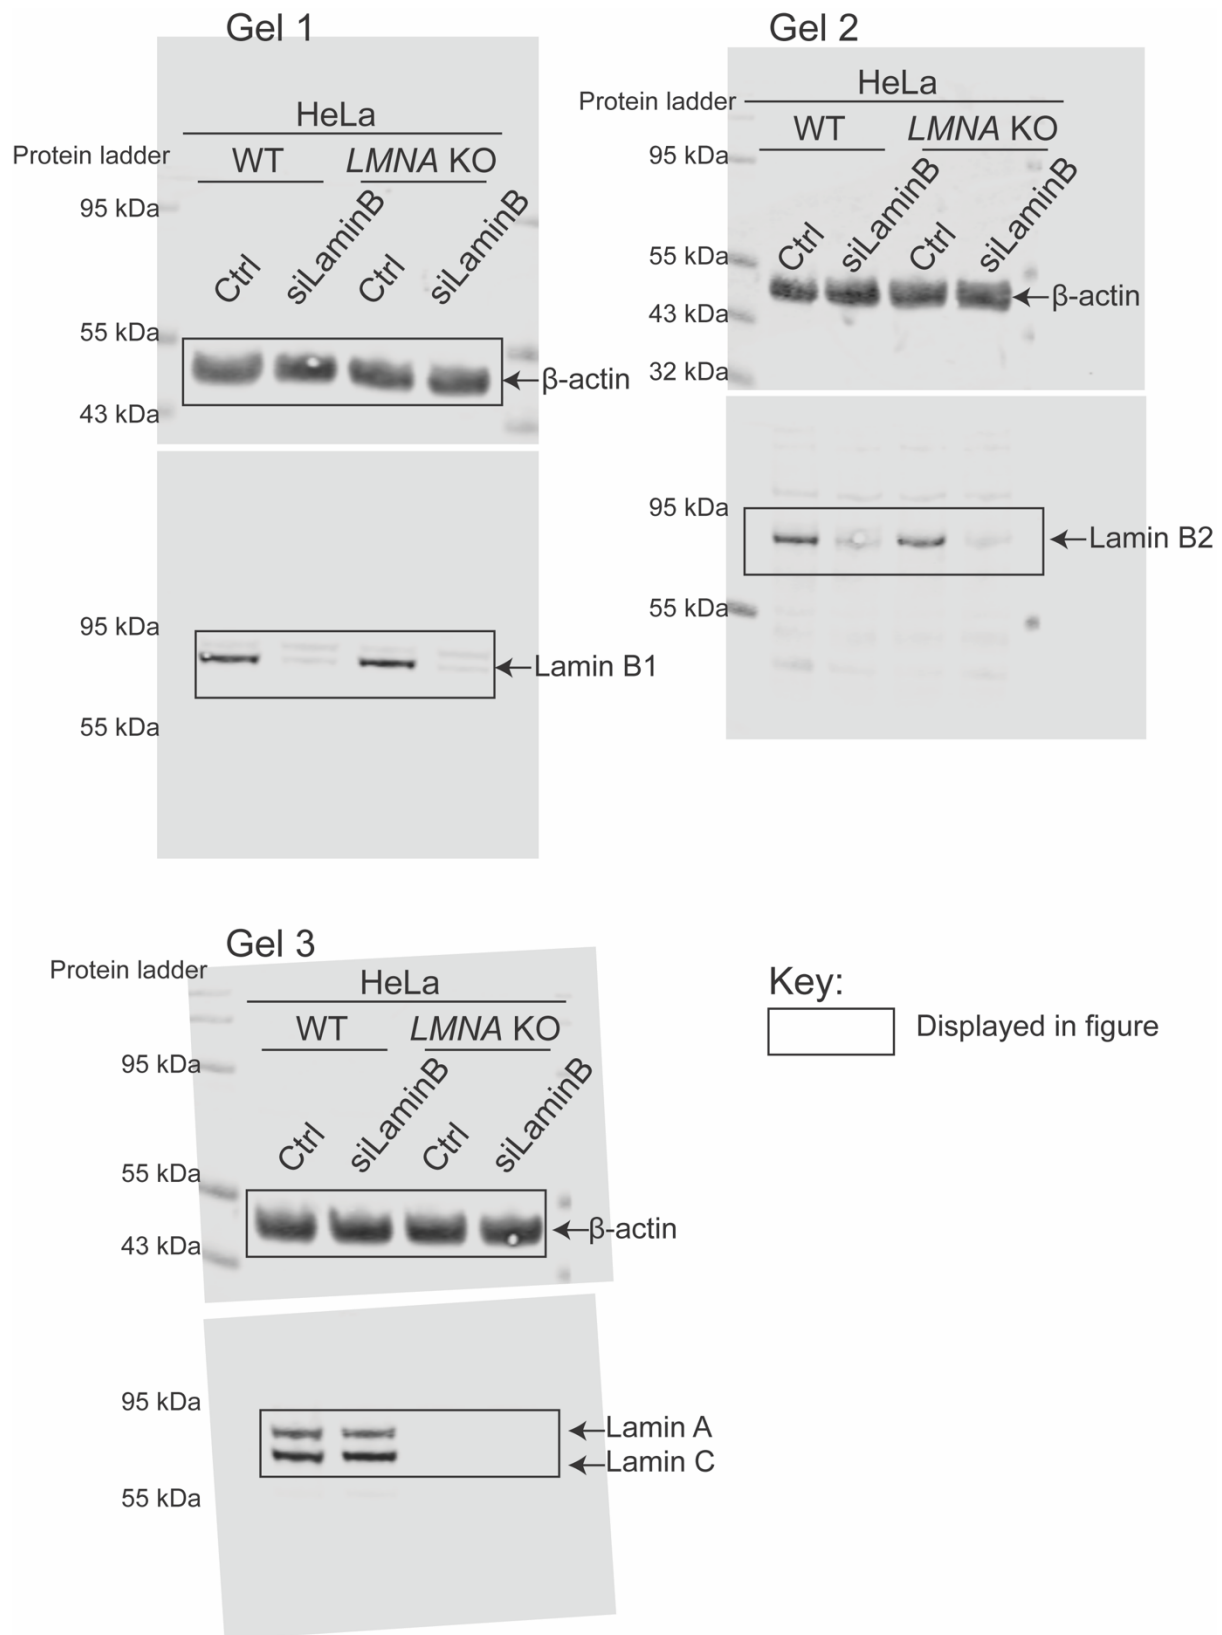

Supplement: fig4-figsupp1-data1 [file Figure_4-figure_supplement_1-source_data_1.pdf › Figure_4-figure_supplement_1-source_data_1.pdf]
